# Supplementary material
Source: MDPI journal article supplement (https://www.mdpi.com/2073-4395/12/1/94)
Supplement: s1 [file s1 › agronomy-1521453-supplementary.pdf]

## Article

# Pilot Cultivation of the Vulnerable Local Endemic Cretan Marjoram *Origanum microphyllum* (Benth.) Vogel (Lamiaceae): Effect of Fertilizers on Growth and Herbal Quality Features

**Supplementary Table S1.** Product details of purchased fertilizers used in the pilot cultivation of *Origanum microphyllum* in Heraklion, Crete, Greece

| Fertilizer                            | Composition                                                                                                                                                                                                                                                                                                                                                                                  | Company purchased                                                     |
|---------------------------------------|----------------------------------------------------------------------------------------------------------------------------------------------------------------------------------------------------------------------------------------------------------------------------------------------------------------------------------------------------------------------------------------------|-----------------------------------------------------------------------|
| <b>THEORUN</b>                        | A nitrogen source liquid fertilizer with N 17% (w/w) P <sub>2</sub> O <sub>5</sub> 0 % (w/w) K <sub>2</sub> O 1.5% (w/w), organic matter 3.2 % (w/w), C/N 0.09, pH 9.1, diurea 0.26%, electric conductivity 86 mS/cm [liquid extract (1‰)]                                                                                                                                                   | THEOFRASTOS, Industrial area of Korinthos, GR-20100 Korinthos, Greece |
| <b>THEOCAL</b>                        | Organic calcium powder fertilizer which mainly contains calcium formate, pH 7.1, Ca 30% (w/w) and organic matter 30%                                                                                                                                                                                                                                                                         |                                                                       |
| <b>THEOFAST</b>                       | Liquid plant growth enhancer including plant extracts of edible raw materials with organic matter 4.4% (w/w) (plant extracts), pH 9.5 and electric conductivity 78 mS/cm [liquid extract (1‰)]                                                                                                                                                                                               |                                                                       |
| <b>THEOMASS</b>                       | Liquid plant growth enhancer including plant extracts of edible raw materials with organic matter 5.4 % (w/w) (plant extracts), pH 9.4 and electric conductivity 85 mS/cm [liquid extract (1‰)]                                                                                                                                                                                              |                                                                       |
| <b>0-0-52</b>                         | Soluble granule fertilizer of K <sub>2</sub> SO <sub>4</sub>                                                                                                                                                                                                                                                                                                                                 | AGRI.FE.M. LTD Fertilizers, Greece                                    |
| <b>MgSO<sub>4</sub></b>               | Mg 25.6% containing MgO 16%, soluble Mg 9.6% and SO <sub>3</sub> 32%                                                                                                                                                                                                                                                                                                                         |                                                                       |
| <b>Plex Mix</b>                       | Containing Fe 3.1% w/w, Mn 1.5% w/w, Zn 0.29% w/w, Cu 0.12% w/w, B 0.27% w/w and Mo 0.13% w/w                                                                                                                                                                                                                                                                                                |                                                                       |
| <b>10-47-10 + TE</b>                  | Containing Total Nitrogen 10%, Phosphorous (P <sub>2</sub> O <sub>5</sub> ) 47 %, Potassium (K <sub>2</sub> O) 10 %, Iron (Fe) 0.1%, Manganese (Mn) 0.05%, Zinc (Zn) 0.015%, Copper (Cu) 0.011%, Molybdenum (Mo) 0.007 %, Boron (B) 0.02%, Monoammonium Phosphate, Potassium Nitrate, Urea, Fe EDTA, Mn EDTA, Zn EDTA, Cu EDTA, Disodium Octaborate Tetrahydrate, Sodium Molybdate 2-hydrate |                                                                       |
| <b>34.4-0-0</b>                       | Neofert®, NH <sub>4</sub> NO <sub>3</sub> ammonium nitrate EC fertilizer with total nitrogen content on dry basis 17% NH <sub>4</sub> form and 17.4% NO <sub>3</sub> form                                                                                                                                                                                                                    | Neochim PLC, Bulgaria                                                 |
| <b>Ca(NO<sub>3</sub>)<sub>2</sub></b> | NITROCAL. Contains total nitrogen of 15.5% and CaO 27%.                                                                                                                                                                                                                                                                                                                                      | Agrohimiki, Greece                                                    |

**Supplementary Table S2.** Experimental field soil properties of the research garden of the Hellenic Mediterranean University used for the fertilization trials on *Origanum microphyllum*. CEC: cation exchange capacity; EC<sub>se</sub>: saturation extract electrical conductivity; SAR: sodium absorption ratio.

| Soil texture                              |                                           |                        | pH                     | CaCO <sub>3</sub>     | EC <sub>se</sub>      | SAR         | Organic C             | Total N    |
|-------------------------------------------|-------------------------------------------|------------------------|------------------------|-----------------------|-----------------------|-------------|-----------------------|------------|
| Sand                                      | Silt                                      | Clay                   |                        |                       |                       |             |                       |            |
|                                           | (g kg <sup>-1</sup> )                     |                        | (1:2 H <sub>2</sub> O) | (g kg <sup>-1</sup> ) | (dS m <sup>-1</sup> ) |             | (g kg <sup>-1</sup> ) |            |
| 651 <sup>†</sup> ± 7 <sup>‡</sup>         | 195 ± 7                                   | 154 ± 0                | 8.1 ± 0.0              | 369 ± 4               | 0.63 ± 0.06           | 0.52 ± 0.03 | 19.3 ± 2.1            | 17.6 ± 0.2 |
| CEC                                       | Available concentration of macronutrients |                        |                        |                       |                       |             |                       |            |
|                                           | NO <sub>3</sub> -N                        | NH <sub>4</sub> -N     | P                      | K                     | Ca                    | Mg          |                       |            |
| (cmol <sub>c</sub> kg <sup>-1</sup> )     | (mg kg <sup>-1</sup> )                    |                        |                        |                       |                       |             |                       |            |
| 16.9 ± 0.4                                | 68.8 ± 15.0                               | 10.8 ± 0.6             | 15.4 ± 3.4             | 260 ± 17              | 3145 ± 62             | 163 ± 20    |                       |            |
| Available concentration of micronutrients |                                           |                        |                        |                       |                       |             |                       |            |
| B                                         | Cu                                        | Zn                     | Fe                     | Mn                    |                       |             |                       |            |
|                                           |                                           | (mg kg <sup>-1</sup> ) |                        |                       |                       |             |                       |            |
| 0.61 ± 0.08                               | 8.0 ± 0.1                                 | 0.89 ± 0.02            | 5.2 ± 0.4              | 3.6 ± 0.5             |                       |             |                       |            |

<sup>†</sup>Mean

<sup>‡</sup>Standard deviation

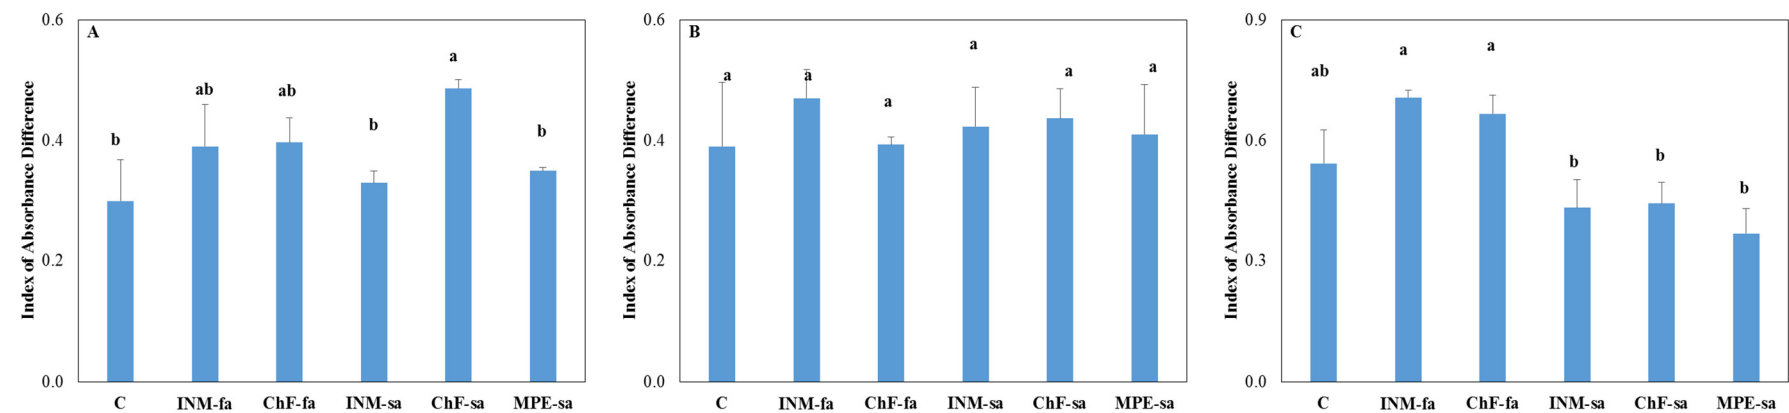

**Supplementary Figure S1.** Effect of fertilization through different (root/foliar) application methods on leaf index of absorbance difference of *Origanum microphyllum* at: (A) Vegetative; (B) Early flowering; (C) Full flowering stage. C: Control (water); INM-fa: Integrated nutrient management (INM) by foliar application; ChF-fa: Conventional fertilization by foliar application; INM-sa: INM by soil application; ChF-sa: Conventional fertilization by soil application; MPE-sa: Mixture of plant extracts as biostimulant by soil application. Values represent the mean of three replicates  $\pm$  SEM. Within each plot different letters indicate significant differences.

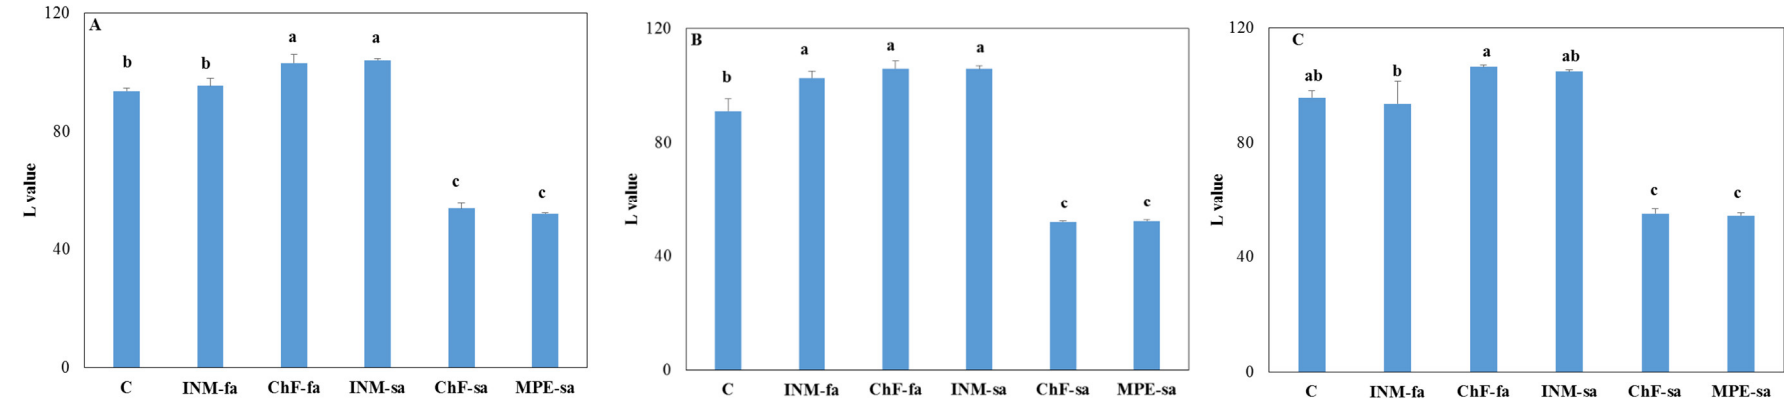

22

**Supplementary Figure S2.** Effect of fertilization through different (root/foliar) application methods on leaf L value of *Origanum microphyllum* at: (A) Vegetative; (B) Early flowering; (C) Full flowering stage. C: Control (water); INM-fa: Integrated nutrient management (INM) by foliar application; ChF-fa: Conventional fertilization by foliar application; INM-sa: INM by soil application; ChF-sa: Conventional fertilization by soil application; MPE-sa: Mixture of plant extracts as biostimulant by soil application. Values represent the mean of three replicates ± SEM. Within each plot different letters indicate significant differences.

23

24

25

26

27

28

29

30

31

32

33

34

35

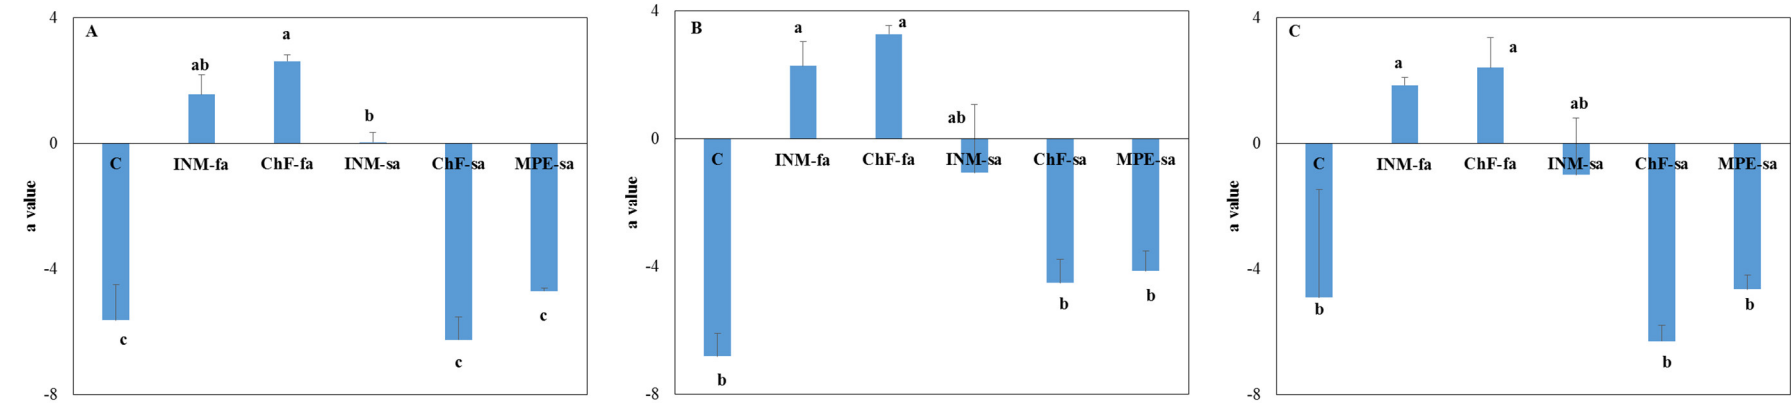

36

37

38

39

40

41

42

43

44

45

46

47

48

49

**Supplementary Figure S3.** Effect of fertilization through different (root/ foliar) application methods on leaf a value of *Origanum microphyllum* at: (A) Vegetation; (B) Early flowering; (C) Full flowering (C) stage. C: Control (water); INM-fa: Integrated nutrient management (INM) by foliar application; ChF-fa: Conventoinal fertilization by foliar application; INM-sa: INM by soil application; ChF-sa: Conventional fertilization by soil application; MPE-sa: Mixture of plant extracts as biostimulant by soil application. Values are the mean of three replicates  $\pm$  sem. Within each plot different letters indicate significant differences.

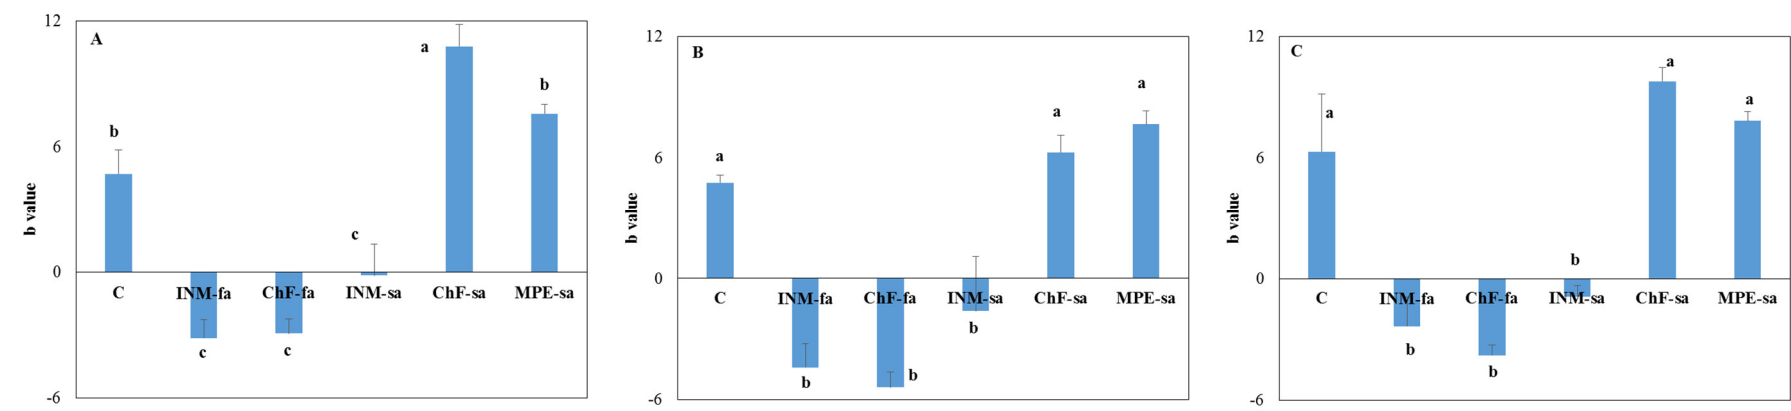

50

51

52

53

54

55

56

**Supplementary Figure S4.** Effect of fertilization through different (root/foliar) application methods on leaf b value of *Origanum microphyllum* at: (A) Vegetation; (B) Early flowering; (C) Full flowering (C) stage. C: Control (water); INM-fa: Integrated nutrient management (INM) by foliar application; ChF-fa: Conventoinal fertilization by foliar application; INM-sa: INM by soil application; ChF-sa: Conventional fertilization by soil application; MPE-sa: Mixture of plant extracts as biostimulant by soil application. Values represent the mean of three replicates  $\pm$  SEM. Within each plot different letters indicate significant differences.
